# Supplementary material for: Defect ferromagnetism induced by lower valence cation doping: Li-doped SnO2 nanoparticles
Source: Royal Society of Chemistry journal article supplement (doi:10.1039/d0ra03644g), 2020-01-01

Supporting Information in response to referees comments

Below we present the Li1s XPS spectrum for  $\text{Sn}_{0.98}\text{Li}_{0.02}\text{O}_2$  sample

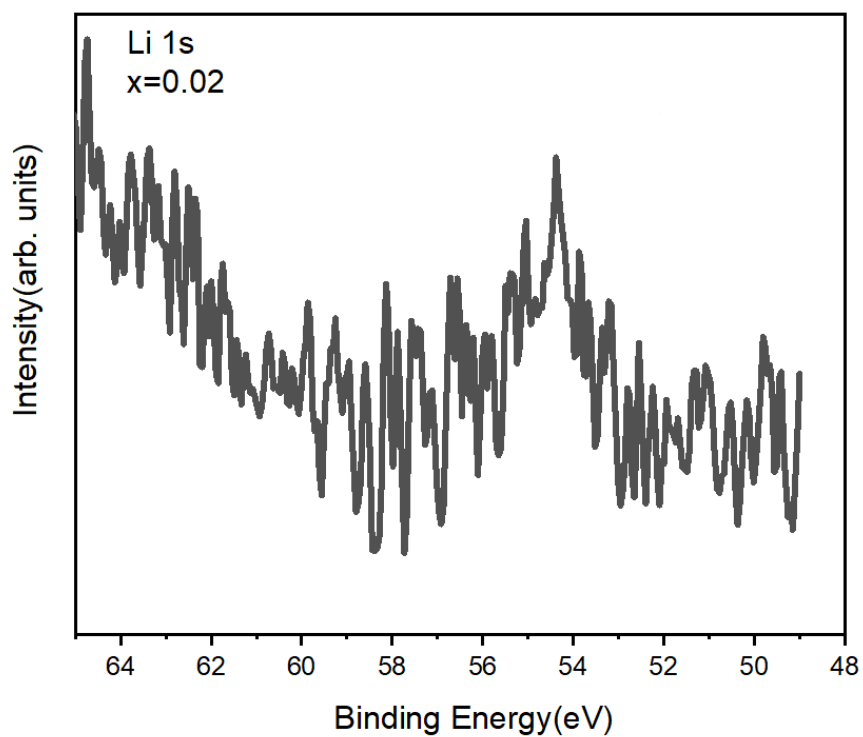

Supplement: d0ra03644g1.pdf [file d0ra03644g1.pdf]
